# Supplementary material for: Replicative Study in Performance-Related Genes of Brazilian Elite Soccer Players Highlights Genetic Differences from African Ancestry and Similarities between Professional and U20 Youth Athletes
Source: MDPI journal article supplement (doi:10.3390/genes14071446), 2023-07-14
Supplement: s1 [file s1]

# Supplemental Material

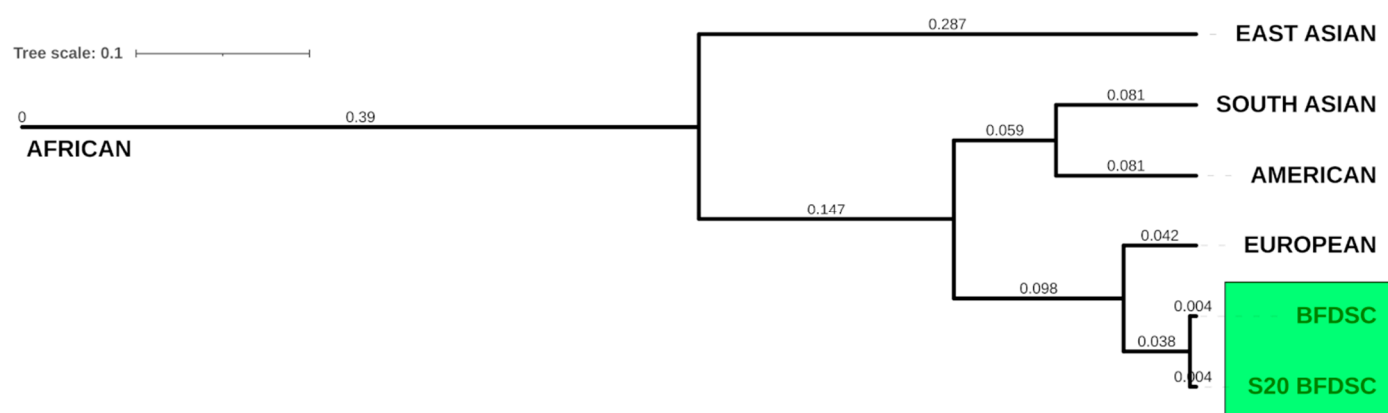

**Figure S1.** Phylogenetic tree (UPGMA model) regarding genetic distance distribution from genotypes of the single nucleotide polymorphisms selected from U20\_BFDSC, BFDSC, and continental populations from the “1000 Genomes database”. U20 indicates under 20 years; BFDSC indicates Brazilian first-division soccer club.
